# Supplementary material
Source: publisher figshare collection journal article supplement (https://sage.figshare.com/ndownloader/files/21443403)
Supplement: Supplementary file 1 [file 21443403]

| **Appendix 1**  ***Studies excluded after full-text review, with reasons (N=40)*** |
| --- |
| **Not reporting outcomes of detained offending samples (7)** |
| Bouman, Y. H. A., de Ruiter, C., & Schene, A. H. (2008). Quality of life of violent and sexual offenders in community-based forensic psychiatric treatment. *Journal of Forensic Psychiatry & Psychology, 19*(4), 484-501. doi:10.1080/14789940701877669 |
| Bouman, Y. H. A., De Ruiter, C., & Schene, A. H. (2010). Changes in quality of life in forensic psychiatric outpatients after 6 months of community-based treatment. *Personality and Mental Health, 4*(4), 257-270. doi:10.1002/pmh.132 |
| Bouman, Y. H. A., Schene, A. H., & de Ruiter, C. (2009). Subjective Well-Being and Recidivism in Forensic Psychiatric Outpatients. *Int J Forensic Ment Health, 8*(4), 225-234. doi:10.1080/14999011003635647 |
| Chenhall, R. D., Senior, K., Cole, D., Cunningham, T., & O'Boyle, C. (2010). Individual quality of life among at risk indigenous youth in Australia. *Applied Research in Quality of Life, 5*(3), 171-183. doi:10.1007/s11482-010-9101-y |
| Cherner, R., Aubry, T., Ecker, J., Kerman, N., & Nandlal, J. (2014). Transitioning into the Community: Outcomes of a Pilot Housing Program for Forensic Patients. *Int J Forensic Ment Health, 13*(1), 62-74. doi:10.1080/14999013.2014.885472 |
| Swanson, J. W., Swartz, M. S., Elbogen, E. B., Wagner, H. R., & Burns, B. J. (2003). Effects of involuntary outpatient commitment on subjective quality of life in persons with severe mental illness. *Behav Sci Law, 21*(4), 473-491. doi:10.1002/bsl.548 |
| Williams, D. J. (2003). “Quality of Life” as Perceived by Sex Offenders on Early Release in a Halfway House. *Journal of Offender Rehabilitation, 38*(2), 77-93. doi:10.1300/J076v38n02_05 |
|  |
| **QoL not measured (11)** |
| Ali, N. A. M., Mohamad, M., Juahir, H., Kamarudin, M. K. A., Muhammad, N., & Lee, M. (2017). SOURCE APPORTIONMENT OF SOCIAL SUPPORT AND QUALITY OF LIFE INDEX AMONG DRUG ABUSE INMATES USING MULTIPLE LINEAR REGRESSION. *Journal of Fundamental and Applied Sciences, 9*, 46-64. doi:10.4314/jfas.v9i2s.4 |
| Beer, A. M., Morgan, R. D., Garland, J. T., & Spanierman, L. B. (2007). The Role of Romantic/Intimate Relationships in the Well-Being of Incarcerated Females. *Psychol Serv, 4*(4), 250-261. doi:10.1037/1541-1559.4.4.250 |
| Dooris, M., McArt, D., Hurley, M. A., & Baybutt, M. (2013). Probation as a setting for building well-being through integrated service provision: evaluating an Offender Health Trainer service. *Perspect Public Health, 133*(4), 199-206. doi:10.1177/1757913913486036 |
| Hudson, N. A., Mrozik, J. H., White, R., Northend, K., Moore, S., Lister, K., & Rayner, K. (2018). Community football teams for people with intellectual disabilities in secure settings: “They take you off the ward, it was like a nice day, and then you get like medals at the end”. *Journal of Applied Research in Intellectual Disabilities, 31*(2), 213-225. doi:10.1111/jar.12359 |
| Johnsen, B., Granheim, P. K., & Helgesen, J. (2011). Exceptional prison conditions and the quality of prison life: Prison size and prison culture in Norwegian closed prisons. *European Journal of Criminology, 8*(6), 515-529. doi:10.1177/1477370811413819 |
| Kelley, T. M. (2011). Thought recognition and psychological well-being: An empirical test of principle based correctional counselling. *Counselling & Psychotherapy Research, 11*(2), 140-147. doi:10.1080/14733145.2010.485689 |
| Meek, R., & Lewis, G. E. (2014). Promoting Well-Being and Desistance Through Sport and Physical Activity: The Opportunities and Barriers Experienced by Women in English Prisons. *Women & Criminal Justice, 24*(2), 151-172. doi:10.1080/08974454.2013.842516 |
| Mohamad, M., Awang, Z., & Ali, N. A. M. (2017). Validating the Maqasid Shariah Prison Quality of Life (MSPQoL) among drug-abuse inmates using confirmatory factor analysis. *International Journal of Applied Business and Economic Research, 15*(24), 91-103. |
| Skarupski, K. A., Parisi, J. M., Thorpe, R., Tanner, E., & Gross, D. (2016). The association of adverse childhood experiences with mid-life depressive symptoms and quality of life among incarcerated males: exploring multiple mediation. *Aging Ment Health, 20*(6), 655-666. doi:10.1080/13607863.2015.1033681 |
| Skarupski, K. A., Parisi, J. M., Thorpe, R., Tanner, E., & Gross, D. (2016). The association of adverse childhood experiences with mid-life depressive symptoms and quality of life among incarcerated males: exploring multiple mediation. *Aging Ment Health, 20*(6), 655-666. doi:10.1080/13607863.2015.1033681 |
| Steptoe, L., Lindsay, W. R., Forrest, D., & Power, M. (2006). Quality of life and relationships in sex offenders with intellectual disability. *J Intellect Dev Disabil, 31*(1), 13-19. doi:10.1080/13668250500488652 |
|  |
| **Health-related QoL (7)** |
| Long, C., McLean, A., Boothby, A., & Hollin, C. (2008). Factors associated with quality of life in a cohort of forensic psychiatric in‐patients. *The British Journal of Forensic Practice, 10*(1), 4-11. doi:10.1108/14636646200800002 |
| Maitland, A. S., & Sluder E, R. D. (1996). Victimization in prisons: A study of factors related to the general well-being of youthful inmates. *Federal Probation, 60*(2), 24-30. |
| Mannocci, A., Masala, D., Mipatrini, D., Rizzo, J., Meggiolaro, S., Di Thiene, D., & La Torre, G. (2015). The relationship between physical activity and quality of life in prisoners: a pilot study. *J Prev Med Hyg, 56*(4), E172-E175. |
| Mannocci, A., Mipatrini, D., D'Egidio, V., Rizzo, J., Meggiolaro, S., Firenze, A., . . . Masala, D. (2017). Health related quality of life and physical activity in prison: a multicenter observational study in Italy. *Eur J Public Health*. doi:10.1093/eurpub/ckx183 |
| Perez, I. R., Soto Blanco, J. M., De Labry Lima, A. O., Castro Recio, J. M., Lopez, E. G., Basanta, J. J., & Plazaola Castano, J. (2006). Factors that affect the quality of life of prison inmates on antiretroviral treatment. *AIDS Care, 18*(5), 433-440. doi:10.1080/09540120500202183 |
| Schram, P. J., & Morash, M. (2002). Evaluation of a life skills program for women inmates in Michigan. *Journal of Offender Rehabilitation, 34*(4), 47-70. doi:10.1300/J076v34n04_03 |
| Togas, C., Raikou, M., & Niakas, D. (2014). An Assessment of Health Related Quality of Life in a Male Prison Population in Greece Associations with Health Related Characteristics and Characteristics of Detention. *Biomed Res Int, 2014*, 9. doi:10.1155/2014/274804 |
|  |
| **Spiritual QoL (2)** |
| Fernander, A., Wilson, J. F., Staton, M., & Leukefeld, C. (2004). An exploratory examination of the Spiritual Well-Being Scale among incarcerated Black and White male drug users. *Int J Offender Ther Comp Criminol, 48*(4), 403-413. doi:10.1177/0306624X04263450 |
| Mandhouj, O., Aubin, H. J., Amirouche, A., Perroud, N. A., & Huguelet, P. (2014). Spirituality and religion among French prisoners: an effective coping resource? *Int J Offender Ther Comp Criminol, 58*(7), 821-834. doi:10.1177/0306624x13491715 |
|  |
| **QoL not self-reported (1)** |
| Fish, R., & Lobley, J. (2001). Evaluating a Forensic Service for People with Learning Disabilities:Comparing Approaches. *Journal of Learning Disabilities, 5*(2), 97-109. doi:10.1177/146900470100500201 |
|  |
| **Full-text not in English, German, or Norwegian (2)** |
| Saloppé, X., & Pham, T. H. (2006). Validation du WHOQOL-bref en hôpital psychiatrique sécuritaire [Vadidation of the WHOQOL-BREF in a forensic setting]. *Psychiatrie et violence [Forensic Psychiatry], 6*(1). |
| Saloppé, X., & Pham, T. H. (2007). [The impact of mental disorders on quality of life perceived by patients discharged from a security psychiatric hospital]. *Encephale, 33*(6), 892-901. doi:10.1016/j.encep.2006.12.003 |
|  |
| **Single-item or unvalidated instrument (3)** |
| Nobile, C. G., Flotta, D., Nicotera, G., Pileggi, C., & Angelillo, I. F. (2011). Self-reported health status and access to health services in a sample of prisoners in Italy. *BMC Public Health, 11*, 529. doi:10.1186/1471-2458-11-529 |
| Shepherd, S. M., Ogloff, J. R., Shea, D., Pfeifer, J. E., & Paradies, Y. (2017). Aboriginal prisoners and cognitive impairment: the impact of dual disadvantage on Social and Emotional Wellbeing. *J Intellect Disabil Res, 61*(4), 385-397. doi:10.1111/jir.12357 |
| Yi, Y., Turney, K., & Wildeman, C. (2017). Mental Health Among Jail and Prison Inmates. *Am J Mens Health, 11*(4), 900-909. doi:10.1177/1557988316681339 |
|  |
| **Instrument could not be retrieved (3)** |
| Talwar, P. (2000). Quality of life among the prison inmates: A study. *Journal of Forensic Medicine and Toxicology, 17*(1), 19-22. |
| Tucker, R. (2004). Pharmacist-led dermatology clinics can improve prisoners' quality of life. *Pharmaceutical Journal, 272*(7298), 577-579. |
| Way, B. B., Buscema, C., & Sawyer, D. (2004). Quality of life instrument in prison: Detecting disability, external validity, and factor structure. *American Journal of Forensic Psychology, 22*(1), 41-52. |
|  |
| **Only part of instrument used (2)** |
| Gold, C., Assmus, J., Hjornevik, K., Qvale, L. G., Brown, F. K., Hansen, A. L., . . . Stige, B. (2014). Music therapy for prisoners: pilot randomised controlled trial and implications for evaluating psychosocial interventions. *Int J Offender Ther Comp Criminol, 58*(12), 1520-1539. doi:10.1177/0306624x13498693 |
| Grills, C., Villanueva, S., Anderson, M., Corsbie-Massay, C. L., Smith, B., Johnson, L., & Owens, K. (2015). Effectiveness of Choice Theory Connections: a cross-sectional and comparative analysis of California female inmates. *Int J Offender Ther Comp Criminol, 59*(7), 757-771. doi:10.1177/0306624x13520129 |
|  |
| **Instrument abandoned by authors (1)** |
| Gullone, E., Jones, T., & Cummins, R. (2000). Coping styles and prison experience as predictors of psychological well-being in male prisoners. *Psychiatry Psychology and Law, 7*(2), 170-181. doi:10.1080/13218710009524983 |
|  |
| **Instrument not in English, German, or Norwegian (1)** |
| Talik, E., & Skowronski, B. (2017). The Sense of Quality of Life and Religious Strategies of Coping with Stress in Prison Inmates. J Relig Health. doi:10.1007/s10943-017-0455-4 |
